# Supplementary material for: Anodic NiO nanoparticles as high-performance asymmetric supercapacitor devices in hybrid electrolytes
Source: Royal Society of Chemistry journal article supplement (doi:10.1039/d5ra07019h), 2025-01-01
Supplement: d5ra07019h1.pdf [file d5ra07019h1.pdf]

## Supplementary information

### **Anodic NiO nanoparticles as a high performance asymmetric supercapacitor device in hybrid electrolyte**

Muhammad Danish<sup>1†</sup>, Jawad Ahmad<sup>1,6†</sup>, Peer Muhammad<sup>2</sup>, Sofia Javed<sup>2</sup>, Anwar Saeed<sup>1</sup>, Nilem Khaliq<sup>3</sup>, Muhammad Haseem Bhatti<sup>1</sup>, Rizwana Ghazi<sup>4</sup>, Asna Fatima Kiyani<sup>5</sup>, Habib Ullah<sup>6</sup>, Yi Xie<sup>6</sup>, Imran Shakir<sup>7\*</sup>, Ghafar Ali<sup>1\*</sup>

<sup>1</sup>Nanomaterials Research Group, Physics Division, PINSTECH, Islamabad 45650, Pakistan

<sup>2</sup>School of Chemical and Material Science, National University of Science and Technology (NUST) Islamabad, Pakistan

<sup>3</sup>Department of Physics, Women University Swabi, KPK, Pakistan

<sup>4</sup>Department of Chemistry, Quaid-i-Azam University, Islamabad 45320, Pakistan

<sup>5</sup>School of Chemistry, University of Edinburgh, Scotland, UK

<sup>6</sup>State Key Laboratory of Silicate Materials for Architectures, Wuhan University of Technology, No. 122, Luoshi Road, Wuhan 430070, China

<sup>7</sup>Department of Physics, Faculty of Science, Islamic University of Madinah, Madinah 42351, Saudi Arabia

\*Corresponding authors: Ghafar Ali, e-mail: [ghafarali@kaist.ac.kr](mailto:ghafarali@kaist.ac.kr)  
[imranskku@gmail.com](mailto:imranskku@gmail.com)

†Both authors have equal contributions

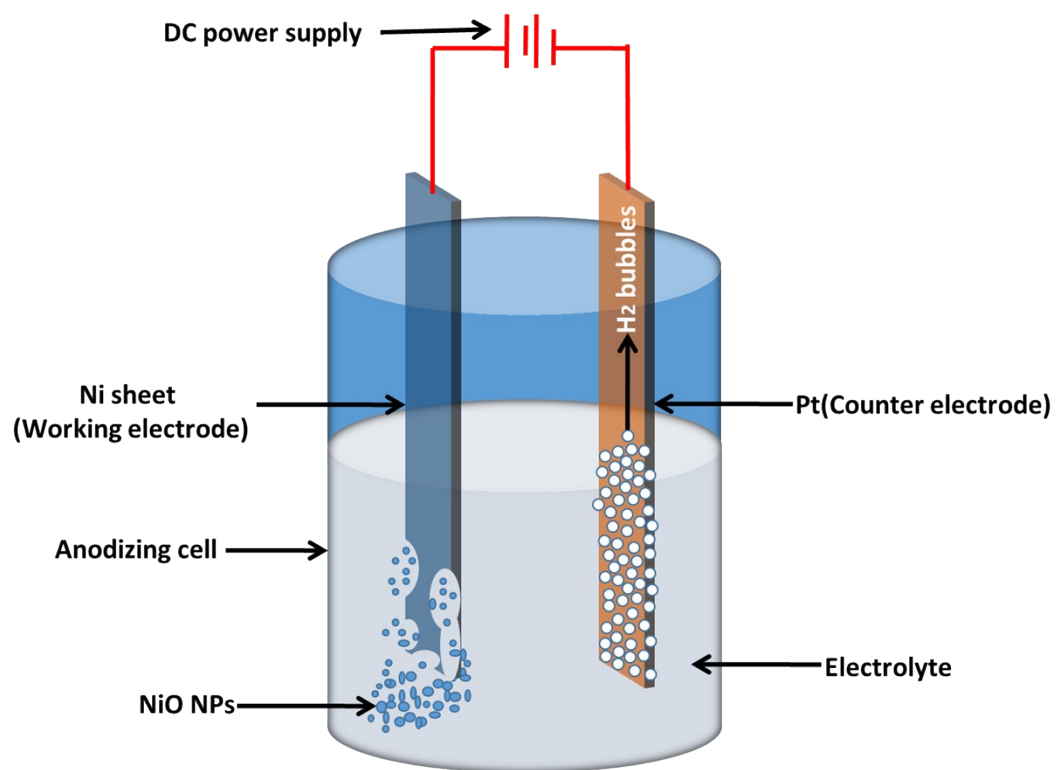

**Fig. S1.** The schematic diagram of the anodization process.

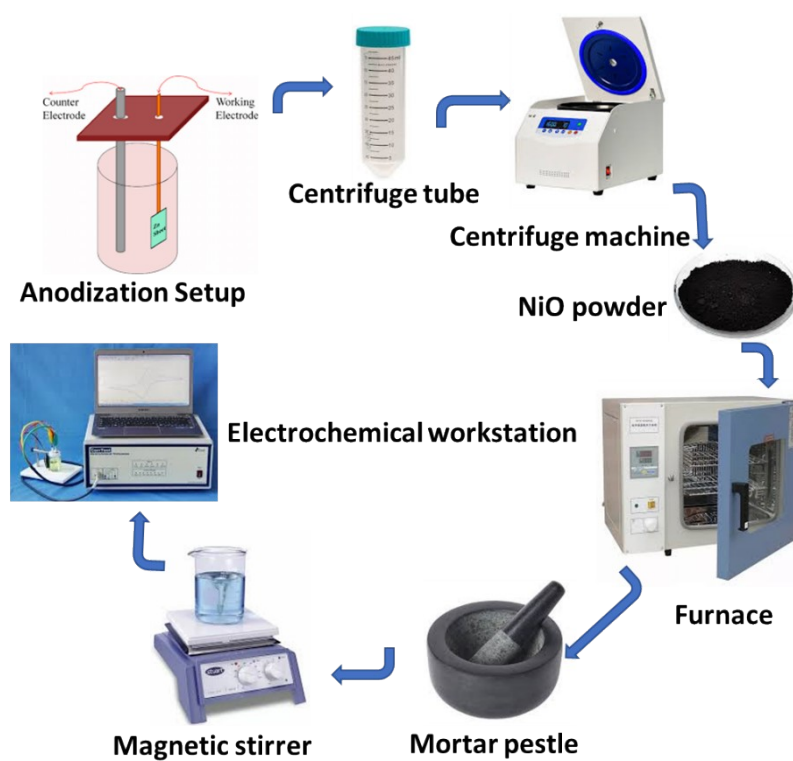

**Fig. S2.** The overall mechanism from the anodic NiO NPs production to the electrochemical measurements.

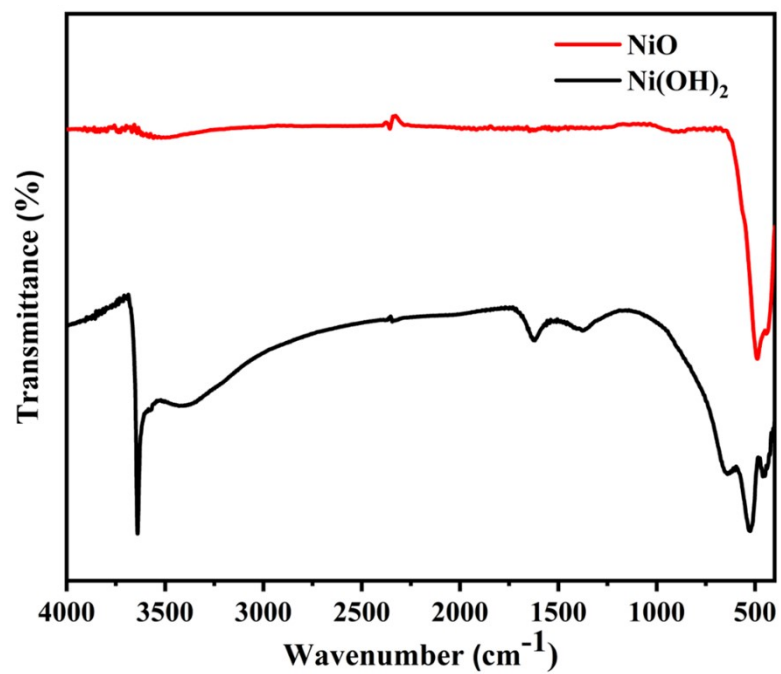

**Fig. S3.** FTIR spectra of  $\text{Ni(OH)}_2$  nanoflowers and NiO NPs.

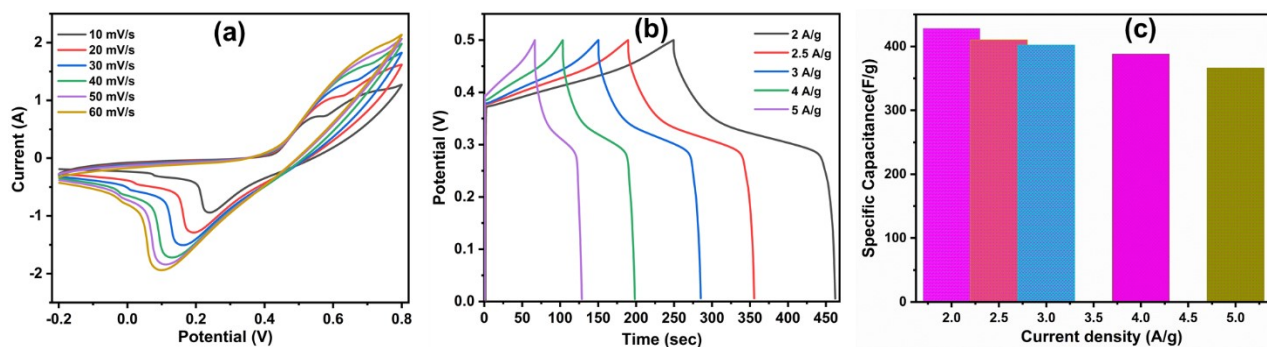

**Fig. S4.** Electrochemical study of Ni(OH)<sub>2</sub> nanoflowers in the hybrid electrolyte (a) CV of the Ni(OH)<sub>2</sub> nanoflowers at different scan rates, (b) GCD curves at various current densities, and (c) specific capacitance at different current densities.

**Table. S1.** Kinetic parameters of NiO NPs and Ni(OH)<sub>2</sub> nanoflowers in the hybrid electrolyte.

| <b>Material</b>     | <b>R<sub>s</sub> (Ω)</b> | <b>R<sub>ct</sub> (Ω)</b> |
|---------------------|--------------------------|---------------------------|
| NiO NPs             | 0.8                      | 2.3                       |
| Ni(OH) <sub>2</sub> | 1.2                      | 2.9                       |

**Table S2.** Specific capacitance of the fabricated device at various current densities

| Current density (A/g) | Specific capacitance (F/g) |
|-----------------------|----------------------------|
| 1.5                   | 170                        |
| 2                     | 163                        |
| 3                     | 157                        |
| 4                     | 133                        |
| 5                     | 87                         |
